# Supplementary material
Source: publisher site journal article supplement (https://cdn.jamanetwork.com/ama/content_public/journal/jama/936583/joi170125supp2_prod.xlsx)
Supplement: Supplementary file 1 [file joi170125supp2_prod.xlsx]

## Sheet: RiskCalculator
	Risk Calculator for Advanced CKD following AKI
	This Calculator is for those hospitalized with AKI and baseline eGFR > 45 mL/min/1.73 m2
	Enter patient's information:
	Age		years	Baseline Scr		mg/dL
	Sex			Peak Scr during hospital admission		mg/dL
	Albuminuria¥			Discharge Scr§		mg/dL
	In-hospital dialysis			AKI stage (Calculated)
	Predicted risk of advanced CKD (sustained eGFR < 30 mL/min/1.73 m2):
	Model	Estimated Risk		Predictors
	1		%	Age, Sex, AKI, Baseline SCr, Disharge Scr§, Albuminuria¥
	2		%	Age, Sex, AKI, Baseline SCr, Disharge Scr§
	3		%	Age, Sex, AKI, Baseline Scr
	4		%	Age, Sex, Disharge Scr§
	5		%	Age, Sex, AKI
	Variable definitions :
	¥ Albuminuria categories	Urine Dipstick Urine ACR (mg/g) MALB		Urine ACR (mg/g) Urine ACR (mg/mmol)
	Normal	negative		< 30	< 3.4
	Mild	trace or 1+		30 ̶ 300	3.4 ̶ 33.9
	Heavy	≥ 2+		> 300	≥ 34
	§ Discharge Scr = last Scr measurement before discharge from a hospital
	Abbreviations: Scr = Serum creatinine, AKI = Acute Kidney Injury, ACR = Albumin to Creatinine Ratio

## Sheet: Sheet2
Age		Warning 1	*Must enter baseline SCr and peak SCr during hospital admission	Models Calculatrion
				Parameters		Model 1		Model 2		Model 3		Model 4		Model 5
Sex		Warning 2	**The Calculator is for those with AKI only	Variables	Values	Beta	beta*X	Beta	beta*X	Beta	beta*X	Beta	beta*X	Beta	beta*X
				Intercept	1	-9.2461	-9.2461	-8.9939	-8.9939	-9.1857	-9.1857	-7.0725	-7.0725	-5.1644	-5.1644
Female	0	Models		Age, years	0	0.0168	0	0.0149	0	0.0126	0	0.0145	0	0.0161	0
Male	0	Model 1 =	0.00964779	Female sex	0	1.0737	0	1.1099	0	1.0218	0	0.8053	0	0.1396	0
		Model 2 =	0.0124149	AKI
Albuminuria		Model 3 =	0.0102484	Stage1	0	0	0	0	0	0	0			0	0
		Model 4 =	0.0847391	Stage2	0	0.2465	0	0.2608	0	0.7893	0			0.6393	0
Normal	0	Model 5 =	0.5684	Stage3	0	0.9027	0	0.9255	0	1.9232	0			1.8474	0
Mild	0			Baseline Scr (mg/dL)	0	1.6209	0	1.8440	0	3.7321	0
Heavy	0			Discharge Scr (mg/dL)
Not measured	0			<1.0	0	0	0	0	0			0	0
Yes/No variable				1.0-<1.3	0	1.0760	0	1.0586	0			1.2223	0
				1.3 -< 1.6	0	2.0514	0	2.0375	0			2.3734	0
No				1.6 -< 1.9	0	2.4292	0	2.4383	0			2.9471	0
Yes				≥ 1.9	0	3.6112	0	3.6059	0			4.4360	0
				Baseline Albuminuria
Discharge SCr (mg/sL)				Normal	0		0
				Mild	0	0.2230	0
<1.0	0			Heavy	0	1.1416	0
1.0-<1.3	0			Not measured	0	0.5103	0
1.3 -< 1.6	0						-9.2461		-8.9939		-9.1857		-7.0725		-5.1644
1.6 -< 1.9	0
≥ 1.9	0
Determine AKI
max inpt SCr - baseline SCr dif =	0
max inpt SCr/baseline SCr ratio =	0
AKI=
stage 1	0
stage 2	0
stage 3	0
